# Supplementary material for: Application of L-band SAR for Sea Ice Monitoring
Source: Royal Society of Chemistry journal article supplement (doi:10.1039/d3sc00037k), 2005-01-01
Supplement: d3sc00037k1.xlsx [file d3sc00037k1.xlsx]

## Sheet: Tabelle1
	Parameter and Input	r / Å	h / Å		%V_Bur_LA	%V_bur_LB		d_LA / Å	d_LB / Å
	required input in blue	3.5	0.88		0.33	0.33		1.41	2.11
	Equations	V_s	V_sc	V_seg	%V_seg	%V_bur_all_seg	V_bcl	%V_bcl	%V_bur_all_bcl	V_cl	%V_cl	%V_bur_all_cl	V_hseg	%V_hseg	%V_bur_all_hseg	V_hbcl	%V_hbcl	%V_bur_all_hbcl
		179.594	7.80134	66.3055	0.369196	1.0292	34.58	0.192545	0.852545	50.4427	0.28087	0.94087	FALSE	0	0.66	FALSE	0	0.66
	Results	Design 1, V_seg		Design 2, V_bcl		Design 3, V_cl		Design 4, V_hseg		Design 5, V_hbcl
		1.0292		0.852545		0.94087		0.66		0.66
